# Supplementary material for: Pilot study of a novel classroom designed to prevent myopia by increasing children’s exposure to outdoor light
Source: PubMed Central journal article supplement (PMC5536284; doi:10.1371/journal.pone.0181772), 2017-07-31
Supplement: pone.0181772.s001.pdf [file pone.0181772.s001.pdf]

# 教室自然光线问卷调查（学生版）

ID: \_\_\_\_\_ 调查日期: \_\_\_\_\_年\_\_\_\_月\_\_\_\_日

目前，近视眼发病率在中国青少年儿童中有不断增加的趋势，多个研究发现增加户外活动可以减少青少年的近视发生和发展，这个项目建造的开放性教室旨在模拟户外环境，您将在教室里学习一周时间。本调查希望可以了解学生在使用开放性教室后的舒适度和满意度，您所填写的资料仅用于科研分析，绝对保密。回答问题时，答出您对光线的感觉是最重要的，没有所谓的答案。感谢您的合作！

0. 您本周在什么教室上课？ <sup>1</sup>□ 传统教室 <sup>2</sup>□ 开放性教室

## 基本信息：

1. 四年级（ ）班

2. 姓名：\_\_\_\_\_

3. 性别： <sup>1</sup>□ 男 <sup>2</sup>□ 女

4. 出生日期：\_\_\_\_\_年\_\_\_\_月\_\_\_\_日

5. 您是否佩戴框架眼镜或隐形眼镜？ <sup>1</sup>□ 是 <sup>2</sup>□ 否

6. 您是否很容易受反光的影响？

<sup>1</sup>□ 非常容易 <sup>2</sup>□ 容易 <sup>3</sup>□ 一般 <sup>4</sup>□ 不容易

<sup>5</sup>□ 非常不容易

7. 您的眼睛是否患有疾病（例如：白内障、青光眼、

外伤等）：<sup>1</sup>□ 是 <sup>2</sup>□ 否

8. 您平均每天在该教室上多少节课？

\_\_\_\_\_节

9. 请按照右图(图一)所示，指出这段时间您的座位

所处的大概位置是：\_\_\_\_\_区

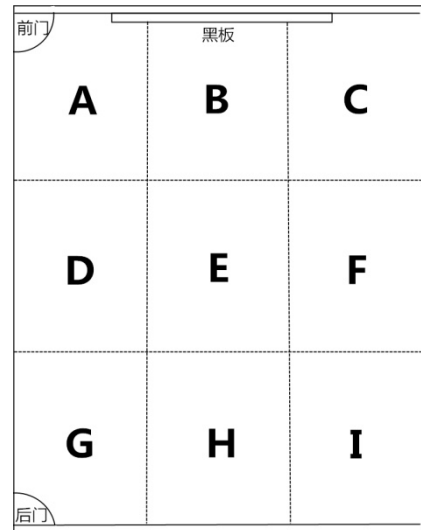

图一：查找自己的位置

## A. 第一部分：

当您坐在您的位置上，请描述透过窗户您能看到些什么呢？（请“√”您觉得最合适的答案）

A1. 在这一周里，您会因为从窗口透过的日光过猛而感到眼部不适吗？

<sup>1</sup>□ 总是会 <sup>2</sup>□ 经常会 <sup>3</sup>□ 有时会 <sup>4</sup>□ 很少会 <sup>5</sup>□ 完全不会

除此之外，还别的什么原因导致您感觉不适吗？\_\_\_\_\_

A2. 您觉得课室的窗户够不够大?

- <sup>1</sup>□ 太大      <sup>2</sup>□ 大了一点      <sup>3</sup>□ 差不多      <sup>4</sup>□ 小了一点      <sup>5</sup>□ 太小

A3. 您觉得在该教室上课对您上课注意力是否有影响?

- <sup>1</sup>□ 严重影响      <sup>2</sup>□ 很影响      <sup>3</sup>□ 影响      <sup>4</sup>□ 轻微影响      <sup>5</sup>□ 完全不影响

## B. 第二部分

请您描述是否能看清楚黑板? (请“√”您觉得最合适的答案)

B1. 在这一周里, 总的来说, 在自然光下是否足够看清楚黑板上的字?

- <sup>1</sup>□ 非常充足      <sup>2</sup>□ 较充足      <sup>3</sup>□ 差不多      <sup>4</sup>□ 缺乏      <sup>5</sup>□ 非常缺乏

B2. 在这一周里, 总的来说, 以下黑板的固定位置(如图所示三个位置)上的字是否够清楚?

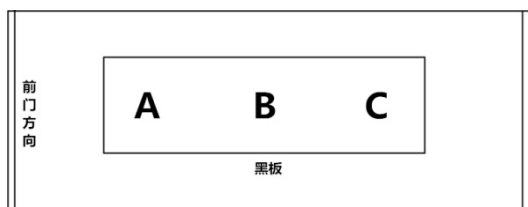

A 位置: <sup>1</sup>□      <sup>2</sup>□      <sup>3</sup>□      <sup>4</sup>□      <sup>5</sup>□  
非常清楚      清楚      一般      不清楚      非常不清楚

B 位置: <sup>1</sup>□      <sup>2</sup>□      <sup>3</sup>□      <sup>4</sup>□      <sup>5</sup>□  
非常清楚      清楚      一般      不清楚      非常不清楚

C 位置: <sup>1</sup>□      <sup>2</sup>□      <sup>3</sup>□      <sup>4</sup>□      <sup>5</sup>□  
非常清楚      清楚      一般      不清楚      非常不清楚

请指出您觉得最容易看清的位置: <sup>1</sup>□ A      <sup>2</sup>□ B      <sup>3</sup>□ C      <sup>4</sup>□ 都容易看清

请指出您觉得最难看清楚的位置: <sup>1</sup>□ A      <sup>2</sup>□ B      <sup>3</sup>□ C      <sup>4</sup>□ 都不容易看清

B3. 在这一周里, 总的来说, 黑板上的明亮度如何?

- <sup>1</sup>□ 太明亮      <sup>2</sup>□ 明亮      <sup>3</sup>□ 差不多      <sup>4</sup>□ 暗      <sup>5</sup>□ 太暗

B4. 在这一周里, 总的来说, 您觉得黑板有反光吗?

- <sup>1</sup>□ 严重反光      <sup>2</sup>□ 很反光      <sup>3</sup>□ 反光      <sup>4</sup>□ 稍微反光      <sup>5</sup>□ 完全不反光

B5. 在一般情况下, 这种反光会妨碍和影响您看黑板上的字吗?

- <sup>1</sup>□ 严重影响      <sup>2</sup>□ 很影响      <sup>3</sup>□ 影响      <sup>4</sup>□ 轻微影响      <sup>5</sup>□ 完全不影响

B6. 当老师讲课时, 您能清楚的看清楚他/她的脸吗?

- <sup>1</sup>□ 非常清楚      <sup>2</sup>□ 清楚      <sup>3</sup>□ 一般      <sup>4</sup>□ 稍不清楚      <sup>5</sup>□ 非常不清楚

B7. 在这一周里, 太阳光会直接照射在黑板上吗?

- <sup>1</sup>□ 总是会      <sup>2</sup>□ 经常会      <sup>3</sup>□ 有时会      <sup>4</sup>□ 很少会      <sup>5</sup>□ 完全不会

B8. 总的来说, 您满意课室黑板上的自然光吗?

- <sup>1</sup>□ 非常满意      <sup>2</sup>□ 满意      <sup>3</sup>□ 一般      <sup>4</sup>□ 不满意      <sup>5</sup>□ 非常不满意

## C. 问卷第三部分

当您读书和写字时，请描述书桌上的自然光线的分布（请“√”您觉得最合适的答案）

C1. 在这一周里，总的来说，在座位上读书写字时是否有充足的自然光？

- <sup>1</sup> 非常充足      <sup>2</sup> 充足      <sup>3</sup> 一般      <sup>4</sup> 缺乏      <sup>5</sup> 非常缺乏

C2. 在这一周里，总的来说，您觉得书桌上的明亮度怎样？

- <sup>1</sup> 太亮      <sup>2</sup> 亮      <sup>3</sup> 差不多      <sup>4</sup> 暗      <sup>5</sup> 太暗

C3. 在这一周里，总的来说，您觉得书桌上有反光吗？

- <sup>1</sup> 严重反光      <sup>2</sup> 很反光      <sup>3</sup> 反光      <sup>4</sup> 稍微反光      <sup>5</sup> 完全不反光

C4. 在一般情况下，这些反光会妨碍和影响您在座位上读书写字吗？

- <sup>1</sup> 严重影响      <sup>2</sup> 很影响      <sup>3</sup> 影响      <sup>4</sup> 轻微影响      <sup>5</sup> 完全不影响

C5. 总的来说，您满意书桌上的自然采光吗？

- <sup>1</sup> 非常满意      <sup>2</sup> 满意      <sup>3</sup> 一般      <sup>4</sup> 不满意      <sup>5</sup> 非常不满意

## D. 第四部分

请描述课室的自然采光情况：（请“√”您觉得最合适的答案）

D1. 在这一周里，总的来说，课室的自然采光是否充足？

- <sup>1</sup> 非常充足      <sup>2</sup> 充足      <sup>3</sup> 一般      <sup>4</sup> 缺乏      <sup>5</sup> 非常缺乏

D2. 在这一周里，总的来说，您对课室的整体印象如何？

- <sup>1</sup> 太过光亮      <sup>2</sup> 光亮      <sup>3</sup> 差不多      <sup>4</sup> 暗      <sup>5</sup> 太过暗

D3. 总的来说，您觉得课室里有什么地方或东西很光亮？如果有的话，是什么？

光亮的地方或东西是： \_\_\_\_\_

这光亮的地方或东西对您在课堂上有什么影响？

- <sup>1</sup> 非常分散注意力      <sup>2</sup> 很分散注意力      <sup>3</sup> 分散注意力      <sup>4</sup> 轻微分散注意力      <sup>5</sup> 完全不分散注意力

D4. 总的来说，自然光的反光对您的妨碍和影响如何？

- <sup>1</sup> 严重影响      <sup>2</sup> 很影响      <sup>3</sup> 影响      <sup>4</sup> 轻微影响      <sup>5</sup> 完全不影响

D5. 在这一周里，太阳光会经常直接照射进课室里吗？

- <sup>1</sup> 总是会      <sup>2</sup> 经常会      <sup>3</sup> 有时会      <sup>4</sup> 很少会      <sup>5</sup> 完全不会

D6. 当太阳光照射进课室里，会不会引起课室内过热？

- <sup>1</sup> 总是会      <sup>2</sup> 经常会      <sup>3</sup> 有时会      <sup>4</sup> 很少会      <sup>5</sup> 完全不会

D7. 总的来说，教室内是否会让您感觉过冷？

- <sup>1</sup>□ 总是会      <sup>2</sup>□ 经常会      <sup>3</sup>□ 有时会      <sup>4</sup>□ 很少会      <sup>5</sup>□ 完全不会

D8. 上课时，您觉得课室里的噪音是怎样？

- <sup>1</sup>□ 非常吵      <sup>2</sup>□ 吵      <sup>3</sup>□ 一般      <sup>4</sup>□ 安静      <sup>5</sup>□ 非常安静

D9. 总的来说，您满意课室里的自然光线吗？

- <sup>1</sup>□ 非常满意      <sup>2</sup>□ 满意      <sup>3</sup>□ 一般      <sup>4</sup>□ 不满意      <sup>5</sup>□ 非常不满意

D10. 总的来说，你觉得课室自然光照明质量如何？

- <sup>1</sup>□ 非常好      <sup>2</sup>□ 好      <sup>3</sup>□ 一般      <sup>4</sup>□ 差      <sup>5</sup>□ 非常差

## E. 第五部分

请描述课室的电灯灯光采光情况：（请“√”您觉得最合适的答案）

E1. 在开了电灯时，请您评估一下课室里的光线是否充足？

- <sup>1</sup>□ 非常充足      <sup>2</sup>□ 充足      <sup>3</sup>□ 一般      <sup>4</sup>□ 缺乏      <sup>5</sup>□ 非常缺乏

E2. 总的来说，电灯光的反光对您的妨碍或影响如何？

- <sup>1</sup>□ 严重影响      <sup>2</sup>□ 很影响      <sup>3</sup>□ 影响      <sup>4</sup>□ 轻微影响      <sup>5</sup>□ 完全不影响

E3. 在课室里，您希望是在自然光或电灯光，还是二者兼之的情况下读书？

- <sup>1</sup>□ 完全自然光      <sup>2</sup>□ 自然光多点      <sup>3</sup>□ 一半一半      <sup>4</sup>□ 电灯光多点      <sup>5</sup>□ 完全电灯光

E4. 您满意课室里的光线（自然光同电灯光一起）吗？

- <sup>1</sup>□ 非常满意      <sup>2</sup>□ 满意      <sup>3</sup>□ 一般      <sup>4</sup>□ 不满意      <sup>5</sup>□ 非常不满意

E5. 假如您对课室的光线照明有什么意见和建议，请说明如下？（您的意见将绝对保密）

---

---

再次感谢您的合作！

如果您对本次问卷有任何疑问和建议，请与中山大学中山眼科中心的康南（教授）医生 020-87682342 联系。
